# Supplementary material for: Half-metallic double perovskite oxides: recent developments and future perspectives
Source: Royal Society of Chemistry journal article supplement (doi:10.1039/d2tc03199j), 2022-01-01
Supplement: d2tc03199j1.pdf [file d2tc03199j1.pdf]

## Electronic Supplementary Information (ESI) Materials:

### Half-metallic double perovskite oxides: recent developments and future perspectives

Qingkai Tang,<sup>a</sup> Xinhua Zhu<sup>\*a</sup>, iD

<sup>a</sup>National Laboratory of Solid State Microstructures, School of Physics, Nanjing University, Nanjing, China

\* E-mail: xhzhu@nju.edu.cn (X. Zhu). iD: 0000-0003-1508-1563

**Table S1** The fundamental structural and physical properties, synthesized methods, structural characterized methods and applications of half-metallic double perovskite oxides as well as the device's performance based on such family of materials

| HM DP oxides                                | Description                                                                                                               |                                                                                                                                                                                                                                                                                                                                                                                                                                                                   |                                          | Ref.                  |            |
|---------------------------------------------|---------------------------------------------------------------------------------------------------------------------------|-------------------------------------------------------------------------------------------------------------------------------------------------------------------------------------------------------------------------------------------------------------------------------------------------------------------------------------------------------------------------------------------------------------------------------------------------------------------|------------------------------------------|-----------------------|------------|
| Basic fundamental properties                | Structure                                                                                                                 | Goldschmidt's tolerance factor ( $t$ )                                                                                                                                                                                                                                                                                                                                                                                                                            |                                          | S1                    |            |
|                                             |                                                                                                                           | $t = \frac{\langle r_A \rangle + r_O}{\sqrt{2} \left( \frac{\langle r_B \rangle + \langle r_B'' \rangle}{2} + r_O \right)}$                                                                                                                                                                                                                                                                                                                                       | $1.05 < t$                               | Hexagonal             | S2, S3, S4 |
|                                             |                                                                                                                           |                                                                                                                                                                                                                                                                                                                                                                                                                                                                   | $1.00 < t < 1.05$                        | Cubic                 |            |
|                                             |                                                                                                                           |                                                                                                                                                                                                                                                                                                                                                                                                                                                                   | $0.97 < t < 1.00$                        | Tetragonal            |            |
|                                             | $t < 0.97$                                                                                                                |                                                                                                                                                                                                                                                                                                                                                                                                                                                                   | Orthorhombic (Pbnm) / monoclinic (P21/n) |                       |            |
| Physical properties                         | High Curie temperature ( $T_C$ ), magnetization ( $M$ ), magnetoresistance (MR), and high electron polarizability ( $P$ ) |                                                                                                                                                                                                                                                                                                                                                                                                                                                                   | S5-S8                                    |                       |            |
| Synthesis of HM DP oxides                   | 0D HM DP oxides                                                                                                           | Solid-state reaction (SSR) method combining with high-energy ball milling process                                                                                                                                                                                                                                                                                                                                                                                 |                                          | S9                    |            |
|                                             |                                                                                                                           | Molten salt synthesis (MSS) method                                                                                                                                                                                                                                                                                                                                                                                                                                |                                          | S10                   |            |
|                                             |                                                                                                                           | Sol-gel process                                                                                                                                                                                                                                                                                                                                                                                                                                                   |                                          | S11                   |            |
|                                             |                                                                                                                           | Coprecipitation method                                                                                                                                                                                                                                                                                                                                                                                                                                            |                                          | S12                   |            |
|                                             |                                                                                                                           | Combustion method                                                                                                                                                                                                                                                                                                                                                                                                                                                 |                                          | S13                   |            |
|                                             |                                                                                                                           | Hydrothermal method                                                                                                                                                                                                                                                                                                                                                                                                                                               |                                          | S14                   |            |
|                                             | 1D HM DP oxides                                                                                                           | Hydrothermal method                                                                                                                                                                                                                                                                                                                                                                                                                                               |                                          | S15                   |            |
|                                             | 2D HM DP oxides                                                                                                           | Pulsed laser deposition (PLD)                                                                                                                                                                                                                                                                                                                                                                                                                                     |                                          | S16                   |            |
|                                             |                                                                                                                           | Magnetron sputtering                                                                                                                                                                                                                                                                                                                                                                                                                                              |                                          | S17                   |            |
|                                             |                                                                                                                           | Chemical solution deposition (CSD)                                                                                                                                                                                                                                                                                                                                                                                                                                |                                          | S18                   |            |
|                                             | 3D HM DP oxides                                                                                                           | Solid-state reaction (SSR) method<br>Spark plasma sintering method<br>Floating-zone method                                                                                                                                                                                                                                                                                                                                                                        |                                          | S19<br>S20<br>S21-S23 |            |
| Microstructural characterization techniques | X-ray diffraction (XRD)/neutron diffraction (ND) methods                                                                  |                                                                                                                                                                                                                                                                                                                                                                                                                                                                   |                                          | S24                   |            |
|                                             | Scanning/transmission electron microscopy (S/TEM)                                                                         |                                                                                                                                                                                                                                                                                                                                                                                                                                                                   |                                          | S25                   |            |
|                                             | Energy dispersive X-ray spectroscopy (EDS)                                                                                |                                                                                                                                                                                                                                                                                                                                                                                                                                                                   |                                          | S26                   |            |
|                                             | Electron energy loss spectroscopy (EELS)                                                                                  |                                                                                                                                                                                                                                                                                                                                                                                                                                                                   |                                          | S27                   |            |
|                                             | X-ray photoelectron spectroscopy (XPS)                                                                                    |                                                                                                                                                                                                                                                                                                                                                                                                                                                                   |                                          | S28                   |            |
|                                             | X-ray magnetic circular dichroism (XMCD)                                                                                  |                                                                                                                                                                                                                                                                                                                                                                                                                                                                   |                                          | S29                   |            |
|                                             | Mössbauer spectroscopy                                                                                                    |                                                                                                                                                                                                                                                                                                                                                                                                                                                                   |                                          | S30                   |            |
| Applications                                | Typical devices based on HM DP oxides                                                                                     | Each device's performance                                                                                                                                                                                                                                                                                                                                                                                                                                         |                                          | Ref.                  |            |
|                                             | Magnetic tunnel junctions (MTJs)                                                                                          | A SFMO/STO/Co tunnel nanojunction measured at 4 K and applied bias voltage of 10 mV; TMR ~ 50%, negative spin polarization ( $P$ ) of SFMO film, $P \sim -85\%$ , indicating the electron tunneling from SFMO through STO.                                                                                                                                                                                                                                        |                                          | S31                   |            |
|                                             | Spin filtering devices (SFDs) based on tunnel junctions                                                                   | (a) Metallic/magnetic insulator/magnetic insulator/metallic (M-MI-MI-M) junctions or (b) ferromagnetic metal/nonmagnetic metal/magnetic insulator/ferromagnetic metal (FM-NM-MIFM) junctions; SFDs can operate at room temperature and exhibit magnetic field sensitivity much larger than conventional tunnel junctions conventional MTJs; TMR as high as $10^5$ predicted in a metal/spin filter 1/spin filter 2/metal structure ( double spin-filter junction) |                                          | S32                   |            |

|                                               |                                                                                                                                                                                                                                                                                                                                                                                                                                                                    |     |
|-----------------------------------------------|--------------------------------------------------------------------------------------------------------------------------------------------------------------------------------------------------------------------------------------------------------------------------------------------------------------------------------------------------------------------------------------------------------------------------------------------------------------------|-----|
| Field effect transistors (FETs)               | A spin MOSFET consisting of a MOS structure and half-metallic-ferromagnet (HMF) contacts for the source and drain; exhibiting high (low) current drive capability in the parallel (antiparallel) magnetization; extremely large magnetocurrent ratio $\gamma_{MC}$ (defined as $\frac{(I_D^P - I_D^{AP})}{I_D^{AP}}$ ) ( $\gamma_{MC} > 1000\%$ @ $V_{DS} < 1.0$ V)                                                                                                | S33 |
| Josephson junctions                           | HM ferromagnet-superconductor bilayers of $\text{La}_{0.7}\text{Ca}_{0.3}\text{MnO}_3/\text{Pr}_{1.85}\text{Ce}_{0.15}\text{CuO}_4$ (LCMO/PCCO) grown by PLD on $\text{NdGaO}_3$ (001) substrates; long-ranged S-F proximity effects observed in the LCMO film (up to a distance much larger than for Cooper pairs in a singlet spin state to exist), which can be attributed to induced triplet-pairing correlations mediated by spin-active interfacial regions. | S34 |
| Applications in the field of electrocatalysts | Ir-based $\text{Ba}_2\text{MIrO}_6$ (e.g., M = Y, La, Ce, Pr, Nd and Tb) DP oxides synthesized by standard solid-state reactions, exhibiting tunable performance towards acidic OER. $\text{Ba}_2\text{PrIrO}_6$ is the best acidic OER electrocatalyst, surpassing the benchmark $\text{IrO}_2$ .                                                                                                                                                                 | S35 |
| Solid oxide fuel cells (SOFC)                 | $\text{La}^{3+}$ -doped $\text{Sr}_2\text{FeMoO}_{6-\delta}$ (SLFM with $0 \leq x \leq 1$ ) double perovskites used as anode materials for solid oxide fuel cells; SOFCs with SLFM( $x=0.2$ ) as anode have demonstrated excellent and stable performance under direct $\text{CH}_4$ ; the high catalytic activity for methane conversion of $>99\%$ at $800$ °C.                                                                                                  | S36 |

**Table S2.** The calculated methods used and the possible HM DP oxide systems as well as the experimentally verified examples.

| Calculation methods                                      | Material systems                                                                                                                        | Calculation results                                                                                               | Experimentally verified                                                | Ref.     |
|----------------------------------------------------------|-----------------------------------------------------------------------------------------------------------------------------------------|-------------------------------------------------------------------------------------------------------------------|------------------------------------------------------------------------|----------|
| Full-potential linearized augmented Plane wave (FPLAPW)  | $\text{Sr}_2\text{CrReO}_6$                                                                                                             | Semiconductor to half-metal transition observed through 5% volume compression                                     | Yes                                                                    | S37      |
|                                                          | $\text{Sr}_{2-x}\text{La}_x\text{Fe}_{1+y/2}\text{Mo}_{1-y/2}\text{O}_6$                                                                | Half-metal feature preserved in SLFMO for $x = 1/2$ and 1 contrary to the case for SFMO                           | Yes                                                                    | S38, S39 |
|                                                          | $\text{Sr}_2\text{MoBO}_6$ (B=W, Re, Os)                                                                                                | $\text{Sr}_2\text{MoOsO}_6$ is a compensated half metal                                                           | Yes                                                                    | S40      |
|                                                          | $\text{La}_2\text{NbMnO}_6$                                                                                                             | HM DP oxide                                                                                                       | No                                                                     | S41      |
|                                                          | $\text{Bi}_2\text{CuCrO}_6$                                                                                                             | Doping with Pb, the system experiences a transition from A-type AFM phase to FiM phase                            | No                                                                     | S42      |
| Full-potential linear muffin-tin orbital method (FPLMTO) | $\text{Sr}_2\text{FeMoO}_6$ , $\text{Sr}_2\text{FeReO}_6$ , $\text{Sr}_2\text{CrWO}_6$                                                  | FiM HM DP oxides                                                                                                  | Yes                                                                    | S43      |
| Linearized Augmented Plane Waves method (LAPW)           | $\text{A}_2\text{FeMoO}_6$ (A = Ca, Sr, and Ba)                                                                                         | Ferromagnetic oxides                                                                                              | Yes                                                                    | S44, S45 |
|                                                          | $\text{LaMM}'\text{O}_3$ , $\text{MM}' = \text{MnCo}$ , $\text{CrFe}$ , $\text{CrRu}$ , $\text{CrNi}$ , $\text{MnV}$ , and $\text{VCu}$ | $\text{La}_2\text{VMnO}_6$ , $\text{La}_2\text{VCuO}_6$ HM DP oxides                                              | Yes, $\text{La}_2\text{VMnO}_6$ ,<br>Yes, $\text{La}_2\text{VCuO}_6$ , | S46      |
|                                                          | $(\text{Ba}_x\text{Sr}_{1-x})_2\text{CoWO}_6$ ( $x=0.1, 0.2, 0.3, 0.5, 0.7, \text{ and } 0.9$ )                                         | $\text{Ba}_2\text{CoWO}_6$ and $\text{SrBaCoWO}_6$ are half-metals                                                | Yes                                                                    | S47      |
| GGA+ U+SOC                                               | $\text{Pb}_2\text{FeOsO}_6$                                                                                                             | Tetragonal $I4/m$ structure and a C-type antiferromagnet                                                          | Yes                                                                    | S48, S49 |
|                                                          | $\text{Sr}_2\text{BB}'\text{O}_6$ (B= Cr, Mo, and B' = W, Re, Os)                                                                       | HM DP oxide                                                                                                       | Yes                                                                    | S50      |
|                                                          | $\text{Pr}_{2-x}\text{Sr}_x\text{MgIrO}_6$                                                                                              | $x = 0.5$ and $1.5$ HM FiM DP oxide                                                                               | No                                                                     | S51      |
|                                                          | $\text{Ca}_2\text{AOsO}_6$ (A = Cr, Mo)                                                                                                 | when the volume is compressed to smaller than $0.9V_0$ , $\text{Ca}_2\text{MoOsO}_6$ turns out to be a half metal | No                                                                     | S52      |
|                                                          | $\text{La}_2\text{NiCrO}_6$                                                                                                             | FM HM DP oxide                                                                                                    | No                                                                     | S53      |

|                                          |                                                                                          |                                                                                                                                                                                                                                                                                                                                                                                      |                                                                                                                                                                                   |          |
|------------------------------------------|------------------------------------------------------------------------------------------|--------------------------------------------------------------------------------------------------------------------------------------------------------------------------------------------------------------------------------------------------------------------------------------------------------------------------------------------------------------------------------------|-----------------------------------------------------------------------------------------------------------------------------------------------------------------------------------|----------|
| GGA + U                                  | $(\text{Sr,Ca})_2\text{BRhO}_6$ (B = Cr, Mn, Fe)                                         | Cr–Rh and Mn–Rh compounds predicted to be FM half-metals                                                                                                                                                                                                                                                                                                                             | No                                                                                                                                                                                | S54      |
|                                          | $\text{Sr}_{2-y}\text{La}_y\text{FeMoO}_6$                                               | FM HM DP oxides                                                                                                                                                                                                                                                                                                                                                                      | Yes                                                                                                                                                                               | S55      |
|                                          | $\text{Sr}_2\text{FeCoO}_6$                                                              | FM HM DP oxide                                                                                                                                                                                                                                                                                                                                                                       | Yes                                                                                                                                                                               | S56      |
|                                          | $\text{A}_2\text{CrRu}(\text{Os})\text{O}_6$ (A = Si, Ge, Sn, and Pb)                    | All its electronic structures convert HM-AF into unconventional AF-Is                                                                                                                                                                                                                                                                                                                | No                                                                                                                                                                                | S57      |
|                                          | $\text{Sr}_2\text{CoWO}_6$                                                               | FM and AFM phases calculated by GGA and GGA+U methods                                                                                                                                                                                                                                                                                                                                | Yes                                                                                                                                                                               | S58      |
|                                          | $\text{La}_2\text{VCuO}_6, \text{La}_2\text{VTcO}_6$                                     | HM AFM DP oxide                                                                                                                                                                                                                                                                                                                                                                      | No                                                                                                                                                                                | S59      |
|                                          | $\text{BaSrNiWO}_6$                                                                      | FM or AFM states                                                                                                                                                                                                                                                                                                                                                                     | Yes                                                                                                                                                                               | S60      |
|                                          | $\text{Bi}_2\text{BB}'\text{O}_6$ (B, B' = 3d transitional metals)                       | $\text{Bi}_2\text{CrNiO}_6$ and $\text{Bi}_2\text{CrZnO}_6$ , HM DP oxides                                                                                                                                                                                                                                                                                                           | No                                                                                                                                                                                | S61      |
|                                          | $\text{Lu}_2\text{NiIrO}_6$                                                              | FiM HM DP oxides                                                                                                                                                                                                                                                                                                                                                                     | Yes                                                                                                                                                                               | S62      |
|                                          | $\text{Pb}_2\text{XX}'\text{O}_6$ (X = Ti, Zr, Hf, V, Nb and Ta, X' = Tc, Ru, Os and Rh) | $\text{Pb}_2\text{NbTcO}_6, \text{Pb}_2\text{TaTcO}_6, \text{Pb}_2\text{TiRuO}_6, \text{Pb}_2\text{ZrRuO}_6, \text{Pb}_2\text{HfRuO}_6, \text{Pb}_2\text{VRuO}_6, \text{Pb}_2\text{NbRuO}_6, \text{Pb}_2\text{TadRuO}_6, \text{Pb}_2\text{ZrOsO}_6, \text{Pb}_2\text{HfOsO}_6, \text{Pb}_2\text{VOsO}_6, \text{Pb}_2\text{ZrRhO}_6$ and $\text{Pb}_2\text{HfRhO}_6$ FiM HM DP oxides | No                                                                                                                                                                                | S63      |
|                                          | $\text{Y}_2\text{CrMnO}_6$                                                               | HM DP oxide                                                                                                                                                                                                                                                                                                                                                                          | Yes                                                                                                                                                                               | S64      |
|                                          | $\text{La}_{1.5}\text{CrFeO}_6$                                                          | $\text{La}_{1.5}\text{CrFeO}_6$ behaves as half-metal with the half-metallic gap of 0.42 eV                                                                                                                                                                                                                                                                                          | Yes                                                                                                                                                                               | S65      |
| Generalized gradient approximation (GGA) | $\text{BiPbVRuO}_6$ and $\text{BiPbVOsO}_6$                                              | HM-AFM DP oxides                                                                                                                                                                                                                                                                                                                                                                     | No                                                                                                                                                                                | S66      |
| GGA and GGA+U                            | $\text{Ba}_2\text{DySbO}_6$                                                              | HM DP oxide                                                                                                                                                                                                                                                                                                                                                                          | Yes                                                                                                                                                                               | S67, S68 |
| GGA and GGA+U                            | $\text{Sr}_2\text{BB}'\text{O}_6$ (B, B' = 3d transition metal)                          | $\text{Sr}_2\text{ScCrO}_6, \text{Sr}_2\text{TiCrO}_6, \text{Sr}_2\text{MnCrO}_6, \text{Sr}_2\text{ZnMnO}_6,$ and $\text{Sr}_2\text{ZnFeO}_6$                                                                                                                                                                                                                                        | $\text{Sr}_2\text{ScCrO}_6$ , No<br>$\text{Sr}_2\text{TiCrO}_6$ , Yes<br>$\text{Sr}_2\text{MnCrO}_6$ , No<br>$\text{Sr}_2\text{ZnMnO}_6$ , No<br>$\text{Sr}_2\text{ZnFeO}_6$ , No | S69      |
| GGA and GGA+U                            | $\text{Ba}_2\text{CdReO}_6$                                                              | FM HM DP oxide                                                                                                                                                                                                                                                                                                                                                                       | Yes                                                                                                                                                                               | S70      |
| GGA, GGA+U, GGA+SOC, and GGA+SOC+U       | $\text{Sr}_2\text{NiOsO}_6$                                                              | FM or AFM HM DP oxide                                                                                                                                                                                                                                                                                                                                                                | Yes                                                                                                                                                                               | S71      |
| GGA, GGA-SOC                             | $\text{Ba}_2\text{MnTeO}_6$                                                              | FM HM DP oxide                                                                                                                                                                                                                                                                                                                                                                       | Yes                                                                                                                                                                               | S72      |
| GGA + mBJ                                | $\text{Ba}_2\text{FeNiO}_6$                                                              | 100% spin polarization                                                                                                                                                                                                                                                                                                                                                               | No                                                                                                                                                                                | S73      |
| GGA-PBE                                  | $\text{Ba}_2\text{MMoO}_6$ (M=Cr, Mn, Fe)                                                | FM HM DP oxide                                                                                                                                                                                                                                                                                                                                                                       | Yes                                                                                                                                                                               | S74      |
| LSDA+U                                   | $\text{Ba}_2\text{CeCoO}_6$                                                              | FM HM DP oxide with space group of $\text{Fm}\bar{3}\text{m}$                                                                                                                                                                                                                                                                                                                        | No                                                                                                                                                                                | S75      |
|                                          | $\text{Sr}_2\text{CoMoO}_6$                                                              | From an AFM semiconductor to a half-metal                                                                                                                                                                                                                                                                                                                                            | Yes                                                                                                                                                                               | S76      |
|                                          | $\text{Ba}_2\text{FeMoO}_6$                                                              | HM DP oxide                                                                                                                                                                                                                                                                                                                                                                          | Yes                                                                                                                                                                               | S77      |
| LSDA+U                                   | $\text{K}_2\text{MnRhO}_6$ and $\text{La}_2\text{CrWO}_6$                                | Compensated half metals                                                                                                                                                                                                                                                                                                                                                              | No                                                                                                                                                                                | S78      |
| LSDA and LSDA+U                          | $\text{Sr}_2\text{Fe}_{1-x}\text{Cr}_x\text{ReO}_6$ (x = 0.0, 0.25, 0.5, 0.75, 1.0)      | Cr doping from $3 \mu_B$ for x = 0.0 down to $1.0 \mu_B$ for x = 1.0 per formula unit                                                                                                                                                                                                                                                                                                | Yes                                                                                                                                                                               | S79      |
| LDA                                      | $\text{Ba}_2\text{MMoO}_6$ (M = Mn, Fe)                                                  | HM DP oxide                                                                                                                                                                                                                                                                                                                                                                          | Yes                                                                                                                                                                               | S80      |
| DFT +U                                   | $\text{Bi}_2\text{FeCrO}_6$                                                              | Doping to induce half-metal to insulator                                                                                                                                                                                                                                                                                                                                             | Yes                                                                                                                                                                               | S81      |
|                                          | $\text{Sr}_2\text{FeMoO}_6$                                                              | Antiferromagnets                                                                                                                                                                                                                                                                                                                                                                     | Yes                                                                                                                                                                               | S82      |
|                                          | $\text{La}_2\text{TiFeO}_6$                                                              | HM                                                                                                                                                                                                                                                                                                                                                                                   | Yes                                                                                                                                                                               | S83      |
| DFT                                      | $\text{Ca}_2\text{Fe}_{1-x}\text{Ni}_x\text{OsO}_6$                                      | x = 0.5, ferrimagnetism with $\mu_{\text{tot}} = 2 \mu_B/\text{f.u.}$                                                                                                                                                                                                                                                                                                                | Yes                                                                                                                                                                               | S84, S85 |
|                                          | $\text{La}_2\text{FeMnO}_6$                                                              | FM HM DP oxide                                                                                                                                                                                                                                                                                                                                                                       | Yes                                                                                                                                                                               | S86, S87 |

## Reference

- S1. P. Ksoll, C. Meyer, L. Schüler, V. Roddatis, V. Moshnyaga, *Crystals*, 2021, **11**, 734–753.
- S2. S. Vasala, M. Karppinen, *Prog. Solid State Chem.*, 2015, **43**, 1–36.
- S3. V.M. Goldschmidt, *Naturwissenschaften*, 1926, **14**, 477–485.
- S4. A. Bhattacharya, S.J. May, *Annu. Rev. Mater. Res.*, 2014, **44**, 65–90.
- S5. H. Kato, T. Okuda, Y. Okimoto, Y. Tomioka, Y. Takenoya, A. Ohkubo, M. Kawasaki, Y. Tokura. *Appl. Phys. Lett.*, 2002, **81**, 328–330.
- S6. H. van Leuken, R.A. de Groot. *Phys. Rev. Lett.*, 1995, **74**, 1171–1173.
- S7. S. Biswas, S. Ram, *Chem. Phys.*, 2004, **306**, 163–169.
- S8. Q. Zhao, Y. Fan, G. Wen, Z. Liu, H. Ma, X. Jia, G. Zou, H.K. Mao, *Mater. Lett.*, 2010, **64**, 592–595.
- S9. S. Middey, S. Jana, S. Ray, *J. Appl. Phys.*, 2010, **108**, 043918.
- S10. L. Fuoco, D. Rodriguez, T. Peppel, P.A. Maggard, *Chem Mater.*, 2011, **23**, 5409–5414.
- S11. X.H. Li, Y.P. Sun, W.J. Lu, R. Ang, S.B. Zhang, X.B. Zhu, W.H. Song, J.M. Dai, *Solid State Commun.*, 2008, **145**, 98–102.
- S12. A.K. Azad, S.-G. Eriksson, A. Khan, A. Eriksson, M. Tseggai, *J. Solid State Chem.*, 2006, **179**, 1303–1311.
- S13. C.R. Lin, Y.M. Chu, S.C. Wang, *Mater. Lett.*, 2006, **60**, 2270–2273.
- S14. X.Y. Li, Z.F. Yao, L.Y. Zhang, G.H. Zheng, Z.X. Dai, K.Y. Chen, *Appl. Surf. Sci.*, 2019, **480**, 262–275.
- S15. M. Alam, K. Karmakar, M. Pal, K. Mandal, *RSC Adv.*, 2016, **6**, 114722–114726.
- S16. N. Kumar, R. Gupta, R. Kaur, D. Oka, S. Kakkar, S. Kumar, S. Singh, T. Fukumura, C. Bera, S. Chakraverty, *ACS Appl. Electron. Mater.*, 2021, **3**, 597–604.
- S17. H. Asano, Y. Kohara, M. Matsui, *Jpn. J. Appl. Phys.*, 2002, **41**, L1081–L1083.
- S18. J. Rager, A.V. Berenov, L.F. Cohen, W.R. Branford, Y.V. Bugoslavsky, Y. Miyoshi, M. Ardakani, J.L. MacManus-Driscoll, *Appl. Phys. Lett.*, 2002, **81**, 5003–5005.
- S19. H. Kato, T. Okuda, Y. Okimoto, Y. Tomioka, K. Oikawa, T. Kamiyama, Y. Tokura, *Phys. Rev. B*, 2004, **69**, 184412.
- S20. T.W. Lim, S.D. Kim, K.D. Sung, Y.M. Rhyim, H. Jeon, J. Yun, K.H. Kim, K.M. Song, S. Lee, S.Y. Chung, M. Choi, S.Y. Choi, *Sci. Rep.*, 2016, **6**, 19746.
- S21. Y. Moritomo, S. Xu, T. Akimoto, A. Machida, N. Hamada, K. Ohoyama, E. Nishibori, M. Takata, M. Sakata, *Phys. Rev. B*, 2000, **62**, 14224–14228.
- S22. Y. Tomioka, T. Okuda, Y. Okimoto, R. Kumai, K.-I. Kobayashi, Y. Tokura, *Phys. Rev. B*, 2000, **61**, 422–427.
- S23. Y. Moritomo, S. Xu, A. Machida, T. Akimoto, E. Nishibori, M. Takata, M. Sakata, K. Ohoyama, *J. Phys. Soc. Jpn.*, 2000, **69**, 1723–1726.
- S24. D. Sanchez, J.A. Alonso, M. Garcia-Hernandez, M.J. Martinez-Lope, M.T. Casais, J.L. Martinez, *J. Mater. Chem.*, 2003, **13**, 1771–1777.
- S25. P. Tieu, X.X. Yan, M.J. Xu, P. Christopher, X.Q. Pan, *Small*, 2021, **17**, 2006482.
- S26. G. Gorokh, A. Zakhlebayaeva, A. Lazavenka, N. Sobolev, V. Zhyllinski, N. Bogomazova, M. Yarmolich, N. Kalanda, *Phys. Status Solidi B*, 2020, **257**, 1900283.
- S27. J.L. Hart, A.C. Lang, A.C. Leff, P. Longo, C. Trevor, R.D. Twesten, M.L. Taheri, *Sci. Rep.*, 2017, **7**, 8243.
- S28. L. Yang, S. Fu, K. Leng, Q.K. Tang, Z.W. Wu, K. Yi, X.H. Zhu, *Open Ceram.*, 2022, **9**, 100238.
- S29. O. Mathon, P. van der Linden, T. Neisius, M. Sikora, J.M. Michalik, C. Ponchut, J.M. De Teresa, S. Pascarelli, *J. Synchrotron Rad.*, 2007, **14**, 409–415.
- S30. M. Yarmolich, N. Kalanda, S. Demyanov, J. Fedotova, V. Bayev, N.A. Sobolev, *Phys. Status Solidi B*, 2016, **253**, 2160–2166.
- S31. M. Bibes, K. Bouzehouane, A. Barthelemy, M. Besse, S. Fusil, M. Bowen, P. Seneor, J. Carrey, V. Cros, A. Vaures, J.-P. Contour, A. Fert, *Appl. Phys. Lett.*, 2003, **83**, 2629–2631.
- S32. M.G. Chapline, S.X. Wang, *J. Appl. Phys.* 2006, **100**, 123909.
- S33. S. Sugahara, M. Tanaka, *Appl. Phys. Lett.*, 2004, **84**, 2307–2309.
- S34. Y. Kalcheim, O. Millo, M. Egilmez, J.W.A. Robinson, M.G. Blamire, *Phys. Rev. B*, 2012, **85**, 104504.
- S35. O. Diaz-Morales, S. Raaijman, R. Kortlever, P.J. Kooyman, T. Wezendonk, J. Gascon, W.T. Fu, M.T.M. Koper, *Nat. Commun.* 2016, **7**, 12363.
- S36. X. Yang, J. Chen, D. Panthi, B.B. Niu, L.B. Lei, Z.H. Yuan, Y.H. Du, Y.F. Li, F.L. Chen, T.M. He, *J. Mater. Chem. A*, 2019, **7**, 733–743.
- S37. J. Wang, N. Zu, Y. Wang, Z. Wu. *Phys. Status Solidi RRL*, 2013, **7**, 583–586.
- S38. D. Stoeffler, *J. Phys. Condens Matter*, 2012, **24**, 046004.
- S39. D. Rubi, *J. Appl. Phys.*, 2004, **95**, 7082–7084.
- S40. N. Zu, L. Rui, Q. Li, J. wang, *J. Magn. Magn. Mater.*, 2016, **399**, 72–76.

- S41. K.A. Parrey, S.A. Khandy, I. Islam, A. Laref, D.C. Gupta, A. Niazi, A. Aziz, S.G. Ansari, R. Khenata, S. Rubab, *J. Electron. Mater.*, 2018, **47**, 3615–3621.
- S42. N. Zu, Q. Zhang, M. Zhang, J. Hao, X. Liu, R. Li, *J. Solid State Chem.*, 2021, **303**, 122521.
- S43. H.T. Jeng, G.Y. Guo, *Phys. Rev. B*, 2003, **67**, 094438.
- S44. C.M. Bonilla, D.A. Tellez, J.A.R. Martinez, J. Roa-Rojas, *Braz. J. Phys.*, 2006, 2006, **36**, 1101–1104.
- S45. A. Isayama, S. Kadota, H. Yui, T. Sasagawa, *Mater. Sci. Eng. B*, 2010, **173**, 44–46.
- S46. W.E. Pickett, *Phys. Rev. B*, 1998, **57**, 10613–10619.
- S47. W. Wong-Ng, G.Y. Liu, D.D. Shi, Y.Q. Yang, R. Derbeshi, D. Windover, J.A. Kaduk, *Powder Diffr.*, 2020, **35**, 1–9.
- S48. Ni. Zu, R. Li, W. Luo, D. Liu, X. Liu, Y. Liu, *J. Magn. Magn. Mater.*, 2019, **491**, 165553.
- S49. Q. Zhao, M. Liu, J. Dai, H. Deng, Y. Yin, L. Zhou, J. Yang, Z. Hu, S. Agrestini, K. Chen, E. Pellegrin, M. Valvidares, L. Nataf, F. Baudalet, L.H. Teng, Y. Yang, C. Jin, Y. Long, *Inorg. Chem.*, 2016, **55**, 9816–9821.
- S50. N. Zu, Q. Zhang, J. Hao, M. Zhang, J. Li, X. Liu, R. Li, *J. Solid State Chem.*, 2022, **312**, 123274.
- S51. M.P. Ghimire, L.H. Wu, X. Hu, *J. Supercond. Nov. Mag.*, 2015, **28**, 917–919.
- S52. N. Zu, R. Li, R. Ai, *J. Magn. Magn. Mater.*, 2018, **467**, 145–149.
- S53. J. Wang, X. Hao, Y. Xu, Z. Li, N. Zu, Z. Wu, F. Gao, *RSC Adv.*, 2015, **5**, 50913–50918.
- S54. A. Halder, D. Nafday, P. Sanyal, T. Saha-Dasgupta, *npj Quantum Mater.*, 2018, **17**, 1–8.
- S55. A.M. Reyes, J.A. Montoy, O. Navarro, *J. Magn. Magn. Mater.*, 2020, **495**, 165877.
- S56. H.P. Wu, L.L. Wang, Y. Qian, W.S. Tan, C.Y. Xiao, K.M. Deng, *J. Appl. Phys.*, 2011, **110**, 083701.
- S57. H. Fuh, Y.P. Liu, S.H. Chen, Y.K. Wang, *J. Alloy. Compd.*, 2013, **547**, 126–131.
- S58. T. Hashemifar, A. Mokhtari, V. Soleimani, *J. Supercond. Nov. Magn.*, 2017, **30**, 497–503.
- S59. Y.K. Wang, P.H. Lee, G.Y. Guo, *Phys. Rev. B*, 2009, **80**, 224418.
- S60. Y. Aharbil, H. Labrim, S. Benmokhtar, M. A. Haddouch, L. Bahmad, A. Belhaj, H. Ez-Zahraouy, A. Benyoussef, *Mater. Chem. Phys.*, 2016, **183**, 588–594.
- S61. H.Z. Lin, C.Y. Hu, P.H. Lee, A.Z. Yan, W.F. Wu, Y.F. Chen, Y.K. Wang, *Materials*, 2019, **12**, 1844.
- S62. S. Nazir, *Sci. Rep.*, 2021, **11**, 1240.
- S63. B.Y. Chen, P.H. Lee, Y.K. Wang, *Materials*, 2022, **15**, 3311.
- S64. W. Wang, F. Liu, X. Zhang, X. Shen, Y. Yao, Y. Wang, B. Liu, X. Liu, R. Yu, *Inorg. Chem. Front.*, 2018, **5**, 217–224.
- S65. H. Wu, Y. Qian, W. Tan, E. Kan, R. Lu, K. Deng, *Phys. Lett. A*, 2015, **379**, 2897–2901.
- S66. K.C. Weng, Y.K. Wang, *J. Phys. Soc. Jpn.*, 2014, **83**, 054715.
- S67. D. Jha, G. Mandal, C. Ray, A.K. Himanshu, B.K. Singh, U. Kumar, B.K. Choudhary, *AIP Conf. Proc.*, 2016, **1731**, 090036.
- S68. C. Vijayakumar, H. Padma Kumar, V.T. Kavitha, S. Solomon, J.K. Thomas, P.R.S. Wariar, J. Koshy, *J. Alloy. Compd.*, 2009, **475**, 778–781.
- S69. Y.P. Liu, S.H. Chen, J.C. Tung, Y.K. Wang, *Solid State Commun.*, 2012, **152**, 968–973.
- S70. S.A. Khandy, S. Yousuf, T.M. Bhat, S. Singh, S.A. Sofi, S.A. Mir, A.Q. Seh, M. Nabi, N.A. Ganie, A. Rasool, R.A. Mir, P. Kumar, D.C. Gupta, *AIP Conf. Proc.*, 2020, **2265**, 030359.
- S71. W. Song, E. Zhao, J. Meng, Z. Wu, *J. Chem. Phys.*, 2009, **130**, 114707.
- S72. H.M. Huang, Q. Yu, R. Tong, C.R. Wu, Z.W. Zhu, Z.D. He, S.J. Luo, *Results Phys.*, 2021, **25**, 104315.
- S73. S.A. Mir, D.C. Gupta, *Sci. Rep.*, 2021, **11**, 10506.
- S74. N.A. Shahed, M. Nishat, S. Khanom, M.K. Hossain, M.A. Hossain, F. Ahmed, *Comput. Condens. Matter*, 2020, **23**, e00464.
- S75. H.H. Xie, Q. Gao, L. Li, G. Lei, X.R. Hu, J.B. Deng, *Solid State Commun.*, 2016, **239**, 49–54.
- S76. C. Liu, W. Wan, S. Gong, H. Zhang, W. Guo, *Sci. Rep.*, 2017, **7**, 3856.
- S77. J.S. Kang, J.H. Park, B.W. Lee, B.I. Min, *J. Phys. Soc. Jpn.*, 2002, **71**, 157–159.
- S78. V. Pardo, W.E. Pickett, *Phys. Rev. B*, 2009, **80**, 054415.
- S79. Q.F. Li, X.F. Zhu, L.F. Chen, *Phys. Lett. A*, 2008, **372**, 2911–2916.
- S80. N.A. Shahed, M.K. Hossain, S. Khanom, M. Nishat, M.J. Alam, M.A. Hossain, F. Ahmed, *SPIN*, 2020, **10**, 2050023.
- S81. P.C. Rout, V. Srinivasan, *Phys. Rev. Lett.*, 2019, **123**, 107201.
- S82. N. Kumar, R. Gupta, R. Kaur, D. Oka, S. Kakkar, S. Kumar, S. Singh, T. Fukumura, C. Bera, S. Chakraverty, *ACS Appl. Electron. Mater.*, 2021, **3**, 597–604.

- S83. E. Fertitta, S. Das, D. Banerjee, F. Ebrahimi, C. Barraud, K. Du, H. Tian, C.J. Pickard, C. Weber, R. Ramesh, P. Littlewood, D. Dubbink, *npj Comput. Mater.*, 2021, **92**, 1-8.
- S84. M.P. Ghimire, X. Hu, *Mater. Res. Express*, 2016, **3**, 106107.
- S85. H.L. Feng, M. Arai, Y. Matsushita, Y. Tsujimoto, Y. Guo, C.I. Sathish, X. Wang, Y.H. Yuan, M. Tanaka, K. Yamaura, *J. Am. Chem. Soc.*, 2014, **136**, 3326–3329.
- S86. Y. Qian, H. Wu, E. Kan, J. Lu, R. Lu, Y. Liu, W. Tan, C. Xiao, K. Deng, *J. Appl. Phys.*, 2013, **114**, 063718.
- S87. M. Nasir, M. Khan, S.A. Agbo, S. Bhatt, S. Kumar, S. Sen, *J. Phys. D: Appl. Phys.*, 2020, **53**, 375003.
